# Supplementary material
Source: PubMed Central journal article supplement (PMC9167752)
Supplement: NIHMS1788563-supplement-Supplementary_Information.pdf [file NIHMS1788563-supplement-Supplementary_Information.pdf]

1 **Screening the *Toxoplasma* kinome with high-throughput tagging (HiT) identifies a regulator of**  
2 **invasion and egress**

3 Tyler A. Smith<sup>1,2</sup>, Gabriella S. Lopez-Perez<sup>2</sup>, Alice L. Herneisen<sup>1,2</sup>, Emily Shortt<sup>1</sup>, Sebastian Lourido<sup>1,2,\*</sup>

4 <sup>1</sup> Whitehead Institute for Biomedical Research, Cambridge, MA 02142, USA

5 <sup>2</sup> Department of Biology, Massachusetts Institute of Technology, Cambridge, MA 02139, USA

6 \* Correspondence: [lourido@wi.mit.edu](mailto:lourido@wi.mit.edu)

7

8 **SUPPLEMENTARY TABLES**

9 **Supplementary Table 1.** Oligos and plasmids used in this study.

10 **Supplementary Table 2.** Combined results from the HiT screens summarizing data from arrayed and  
11 pooled analyses.

12

13

14 **SUPPLEMENTARY FIGURES**

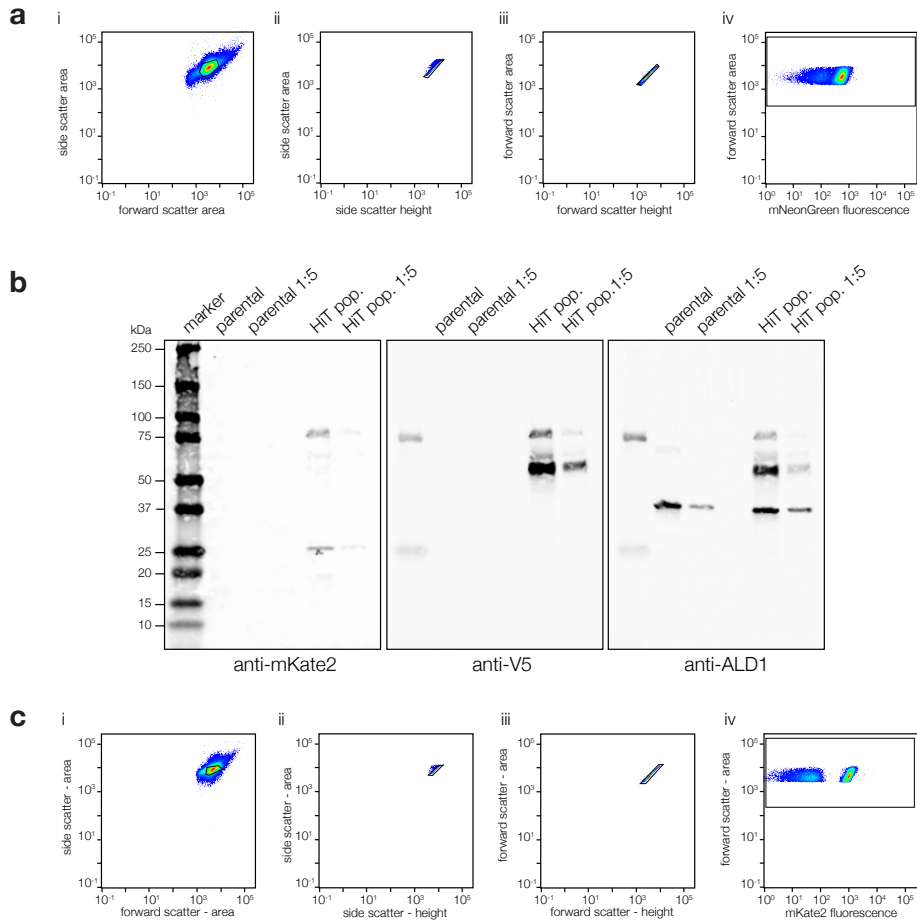

15

16 **Supplementary Figure 1. Flow cytometry gating strategies and complete immunoblot of transfected**  
 17 **HiT populations. a**, Flow cytometry gating strategy for **Fig. 1b**, **Fig. 1l**, and **Extended Data Fig. 1d**.  
 18 Events were subsequently gated for toxoplasma (i) and single cells (ii-iii). Events were used to create  
 19 histograms of mNeonGreen fluorescence in **Fig. 1b**, **Fig. 1l**, and **Extended Data Fig. 1d** (iv). Example  
 20 pseudocolor density plots are provided from the CDPK3 HiT 3'  $CDPK3$  population of **Fig. 1b**. **b**, Complete  
 21 immunoblot from **Fig. 1f**. CDPK1-V5-T2A was detected using an anti-V5 antibody, mKate2 was detected  
 22 using an anti-RFP antibody, and ALD1 was used as a loading control. **(c)** Flow cytometry gating strategy  
 23 for **Fig. 1e**. Events were subsequently gated for toxoplasma (i) and single cells (ii-iii). Events were used to  
 24 create a histogram of mKate2 fluorescence in **Fig. 1e** (iv). Example pseudocolor density plots are provided  
 25 from the CDPK1 HiT 3'  $CDPK3$  population of **Fig. 1e**.

26

27

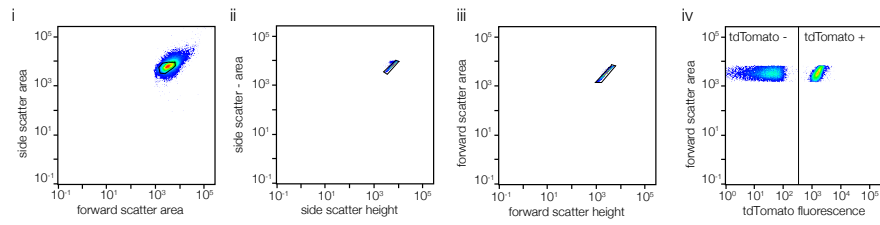

28

29 **Supplementary Figure 2. Flow cytometry gating strategy of competition experiments.** Flow cytometry  
30 gating strategy for **Fig. 4b**. Events were subsequently gated for toxoplasma (i) and single cells (ii-iii). Events  
31 were binned as either tdTomato positive or tdTomato negative using the TIR1 and TIR1/IMC1-tdTomato  
32 strains as references (iv). Example pseudocolor density plots are provided from the starting population of  
33 the WT sample.

34

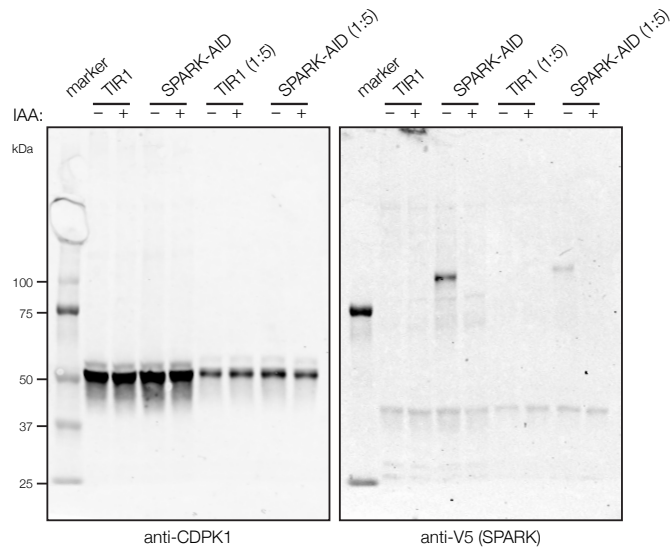

35

36 **Supplementary Figure 3. Complete immunoblot of SPARK knockdown.** Full immunoblot from **Fig. 5d**.  
 37 SPARK-AID was detected using an anti-V5 antibody and CDPK1 was used as a loading control.
